# Supplementary material
Source: PubMed Central journal article supplement (PMC3369758)
Supplement: cn200001k_si_001.pdf [file cn200001k_si_001.pdf]

**Supplemental Figures for:**

**Point mutations in A $\beta$  induce polymorphic aggregates at liquid/solid  
interfaces**

*Elizabeth A. Yates<sup>1</sup>, Elena M. Cucco<sup>3</sup>, and Justin Legleiter<sup>1,2,3,\*</sup>*

<sup>1</sup>The C. Eugene Bennett Department of Chemistry; <sup>2</sup>WVnano Initiative; <sup>3</sup>the Center for  
Neurosciences,

West Virginia University; 217 Clark Hall; PO Box 6045; Morgantown, WV 26506

\* Corresponding author:

Justin Legleiter  
West Virginia University  
The C. Eugene Bennett Department of Chemistry  
217 Clark Hall  
PO Box 6045  
Morgantown, WV 26506  
Email: justin.legleiter@mail.wvu.edu  
Phone: (304)293-3435 ext. 6436  
Fax: (304) 293-4904

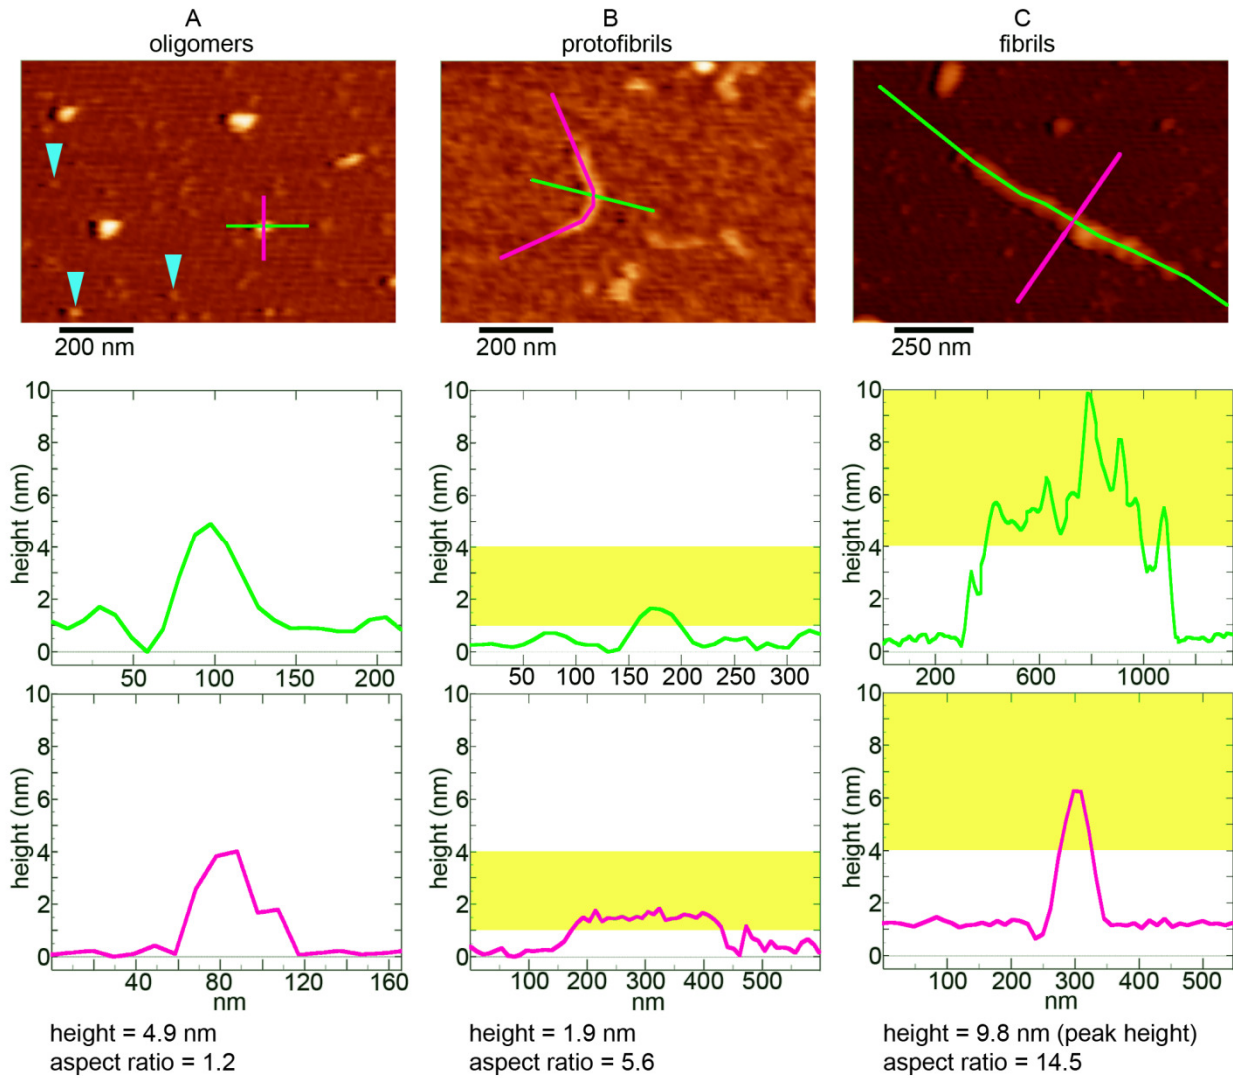

**Supplemental Figure 1. Representative *ex situ* AFM images demonstrate the classification of A $\beta$  aggregates.** Representative AFM images and aggregate profiles that compare basic dimensions of (A) oligomers, (B) protofibrils, and (C) fibrils are shown. Height profiles under each image are indicated by *colored lines*. The blue arrows in (A) indicate the appearance of smaller oligomers. By using a combination of height and aspect ratio, relative populations of aggregates types can be distinguished and quantified in a heterogeneous mixture. Oligomers can be distinguished from protofibrils and fibrils by aspect ratio. Protofibrils and fibrils can be distinguished from each other by height, as indicated by the yellow shading in the height profiles.

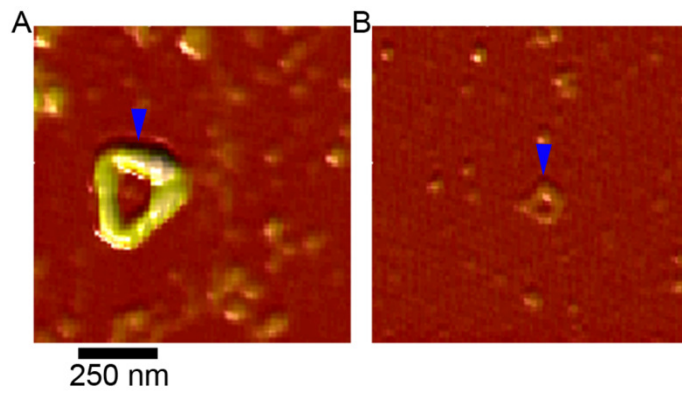

**Supplemental Figure 2. A small number of annular aggregates were observed in incubations of Wild Type and mutant A $\beta$ .** (A) Large ring structures with inner diameters on the order of 100 nm and (B) small ring structures with inner diameters on the order of 25 nm were observed.

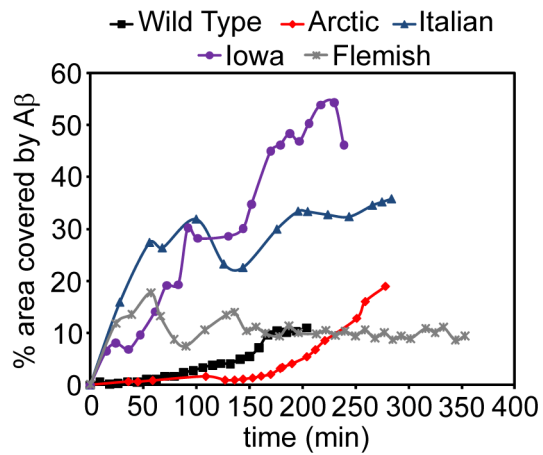

**Supplemental Figure 3. Wild Type and mutant forms of A $\beta$  absorb to mica with variable rates.** Quantification of the percent of the surface covered by aggregates of the different forms of A $\beta$  as a function of time is presented. While the absorption of Wild Type, Arctic, Italian, and Iowa A $\beta$  was performed at 20  $\mu$ M, Flemish A $\beta$  experiments were performed at a higher concentration (40  $\mu$ M) as very little Flemish A $\beta$  aggregation was observed at 20  $\mu$ M within 400 minutes.

**Supplemental Movie 1. A series of *in situ* AFM images demonstrating the aggregation of Wild Type A $\beta$ (1-40) on mica.** The aggregation was recorded over a time period of 204 min. with 24 frames.

**Supplemental Movie 2. A series of *in situ* AFM images demonstrating the aggregation of Arctic A $\beta$ (1-40) on mica.** Colored boxes indicate regions of interest where oligomers eventually nucleated or were incorporated into highly ordered fibrillar aggregates. These elongated aggregates displayed long range order as they grew in three specific directions defined by the underlying mica substrate. The aggregation was imaged over a time period of 278 min. with 19 frames.

**Supplemental Movie 3. A series of *in situ* AFM images demonstrating the aggregation of Italian A $\beta$ (1-40) on mica.** In the purple and blue boxes, smaller oligomers appear to coalesce into larger oligomers and highly curved fibrillar structures reminiscent of protofibrils. The yellow box indicates a region where some more rigid (straight morphology) fibrillar aggregates appeared that were similar to those formed predominately by Arctic A $\beta$  on mica. The aggregation was imaged over a time period of 284 min. with 15 frames.

**Supplemental Movie 4. A series of *in situ* AFM images demonstrating the aggregation of Iowa A $\beta$ (1-40) on mica.** Purple and yellow boxes highlight areas where small oligomers (2-3 nm tall) of Iowa A $\beta$  initially are the predominate aggregate formed, but these oligomers quickly coalesced into a dense mesh of elongated aggregates. The aggregation was imaged over a time period of 239 min. with 22 frames.

**Supplemental Movie 5. A series of *in situ* AFM images demonstrating the aggregation of Flemish A $\beta$ (1-40) on mica.** Within the purple box, smaller and larger oligomers come together to form a larger oligomeric aggregates. The yellow box indicates a region where some oligomers aggregated into extended fibrillar structures reminiscent of protofibrils. The aggregation was imaged over a time period of 353 min. with 32 frames.
